# Supplementary material for: A hybrid of MIL-53(Fe) rhombus and conductive CoNi2S4 nanosheets as a synergistic electrocatalyst for the oxygen evolution reaction
Source: Royal Society of Chemistry journal article supplement (doi:10.1039/d3dt00704a), 2023-01-01
Supplement: d3dt00704a1.pdf [file d3dt00704a1.pdf]

## Supplementary Material

### **A hybrid of MIL-53(Fe) rhombus and conductive CoNi<sub>2</sub>S<sub>4</sub> nanosheets as a synergistic electrocatalyst for oxygen evolution reaction**

Weidong Liu <sup>a</sup>, Lijun Wang<sup>a</sup>, Yaqiong Gong <sup>a,\*</sup>

<sup>a</sup> College of Chemistry and Chemical Engineering, North University of China,  
Taiyuan 030051, P. R. China

\* Email: gyq@nuc.edu.cn (Yaqiong Gong)

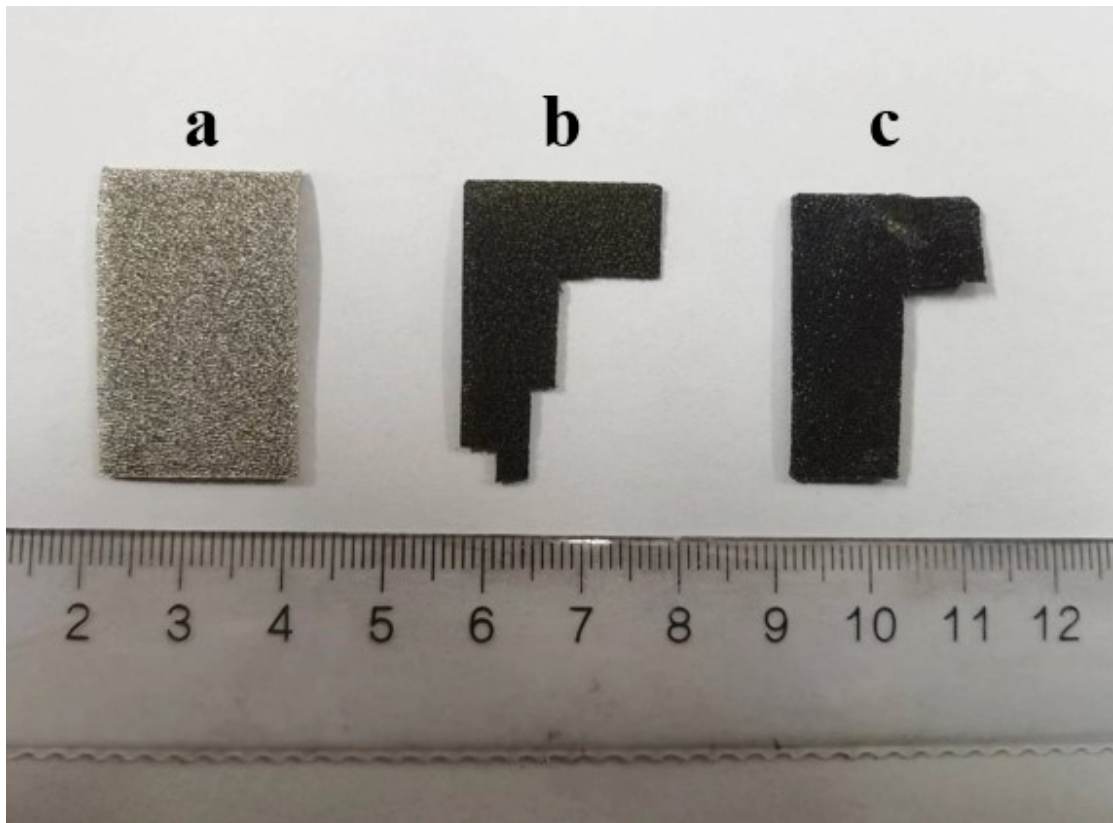

**Fig. S1.** Photograph of (a) NF, (b)  $\text{CoNi}_2\text{S}_4/\text{NF}$  and (c)  $\text{MIL-53(Fe)}@\text{CoNi}_2\text{S}_4/\text{NF}$ .

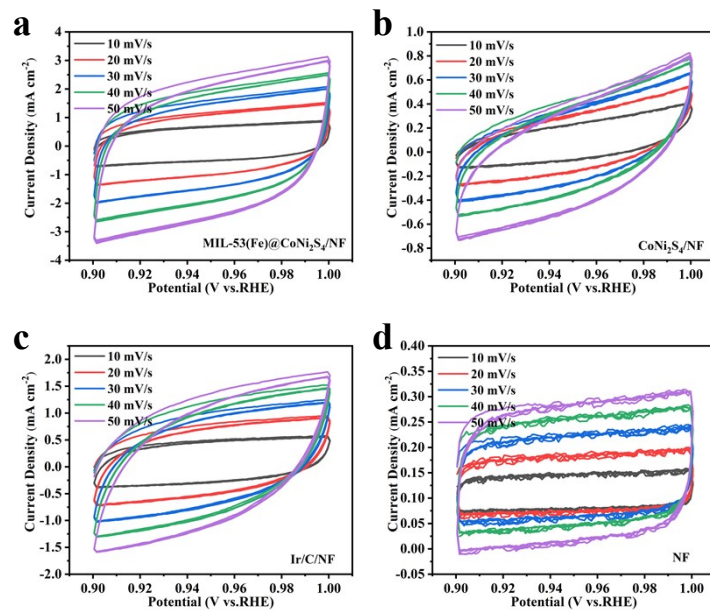

**Fig. S2.** Cyclic voltammetry curves of (a) MIL-53(Fe)@CoNi<sub>2</sub>S<sub>4</sub>/NF, (b) CoNi<sub>2</sub>S<sub>4</sub>/NF, (c) Ir/C/NF, and (d) NF.

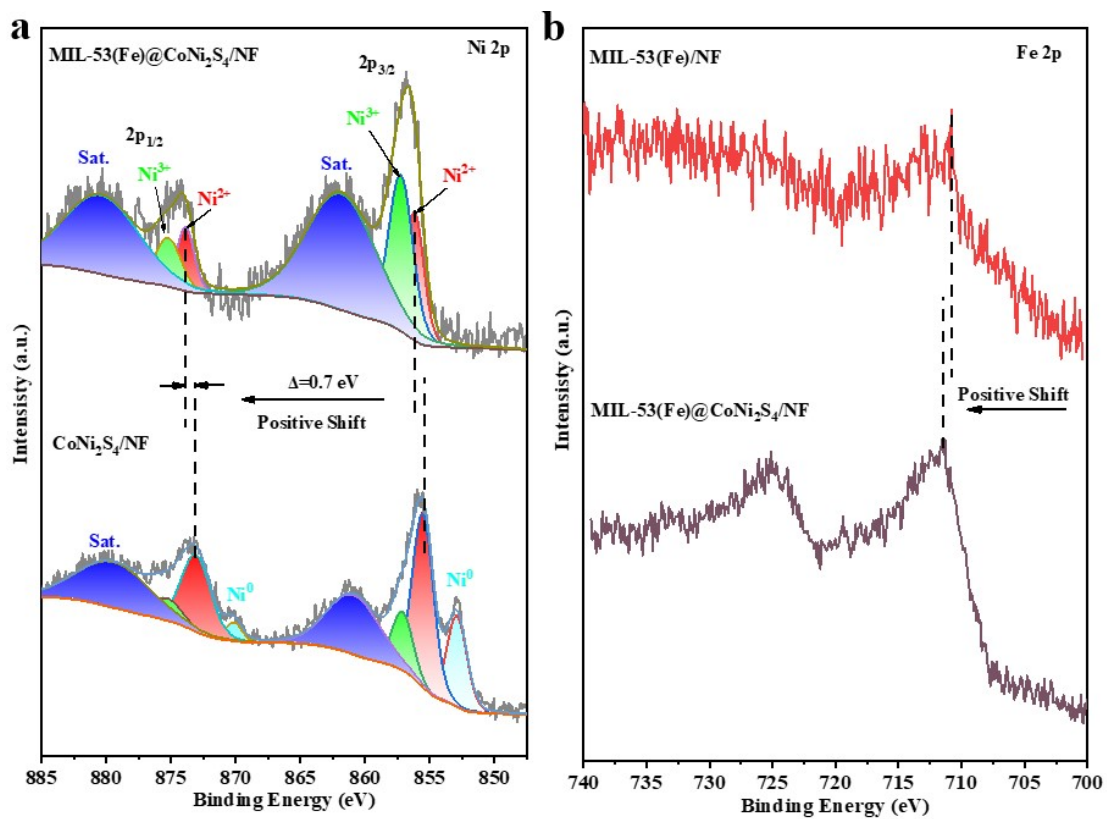

**Fig. S3.** Comparative XPS spectra of the two catalysts (a) Ni 2p and (b) Fe 2p.

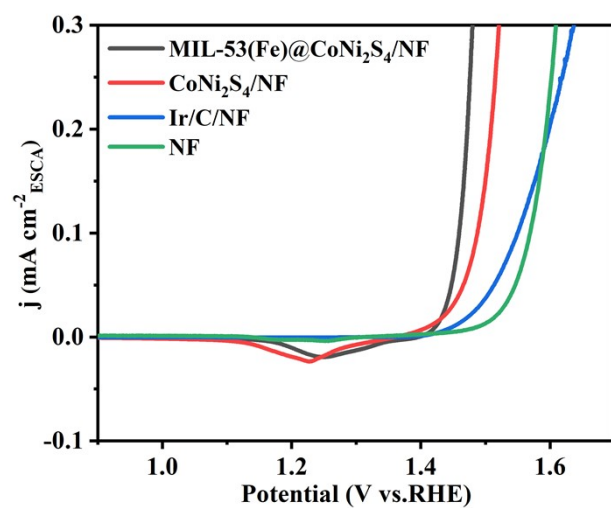

**Fig. S4.** ECSA-normalized current density curves of catalysts 1.0 M KOH.

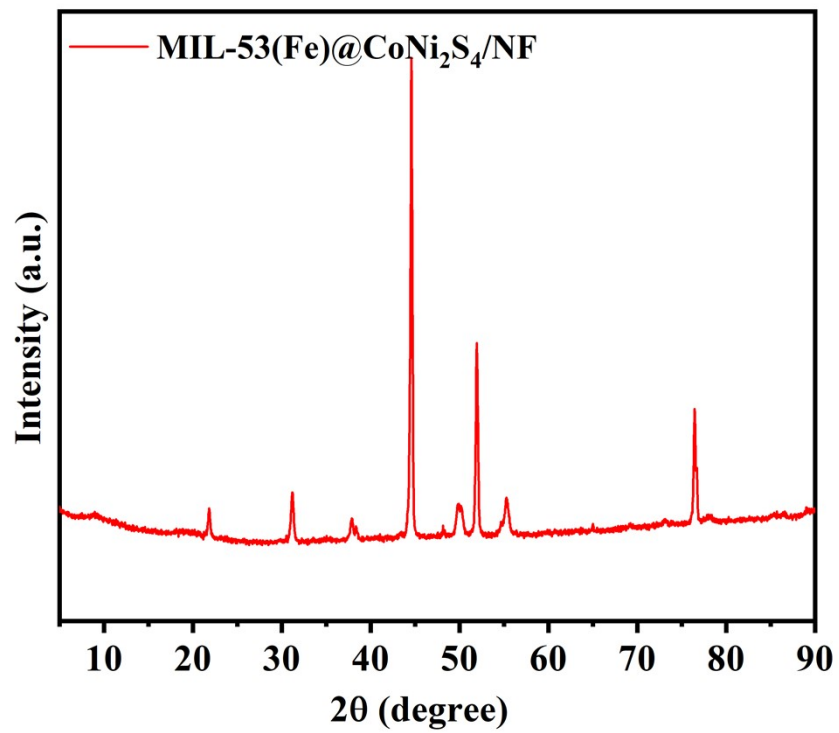

**Fig. S5.** XRD pattern of MIL-53(Fe)@CoNi<sub>2</sub>S<sub>4</sub>/NF after OER stability test.

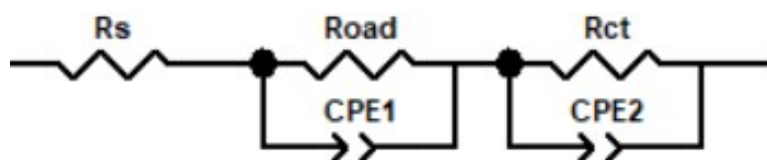

Table S1. The resistance value in the analog circuit of each catalyst.

| Samples                                         | $R_s(\Omega)$ | $R_{oad}(\Omega)$ | $R_{ct}(\Omega)$ |
|-------------------------------------------------|---------------|-------------------|------------------|
| MIL-53(Fe)@CoNi <sub>2</sub> S <sub>4</sub> /NF | 2.102         | 0.923             | 2.616            |
| MIL-53(Fe)/NF                                   | 1.942         | 0.246             | 14.74            |
| CoNi <sub>2</sub> S <sub>4</sub> /NF            | 1.913         | 5.478             | 23.23            |
| IrC/NF                                          | 1.999         | 1.326             | 13.54            |
| NF                                              | 1.675         | 6.735             | 213.3            |

**Table S2.** Comparison of OER activity of the MIL-53(Fe)@CoNi<sub>2</sub>S<sub>4</sub>/NF catalyst with other reported electrocatalysts in 1.0 M KOH

| Electrocatalysts                                       | Overpotential<br>(mV) at 10<br>mA cm <sup>-2</sup> | Tafel slope<br>(mV dec <sup>-1</sup> ) | Reference                                                     |
|--------------------------------------------------------|----------------------------------------------------|----------------------------------------|---------------------------------------------------------------|
| MIL-53(Fe)@CoNi <sub>2</sub> S <sub>4</sub> /NF        | 192                                                | 33.98                                  | This work                                                     |
| rGo@SN-CoNi <sub>2</sub> S <sub>4</sub>                | 310                                                | 61                                     | Rare Metals, 41<br>(2021) 911-920.                            |
| P-CoNi <sub>2</sub> S <sub>4</sub> /CC                 | 228                                                | 56                                     | Applied Surface<br>Science, 554 (2021).                       |
| NiMn LDH/NiCo <sub>2</sub> O <sub>4</sub> /NF          | 310                                                | 99                                     | Journal of Power<br>Sources, 392 (2018)<br>23-32.             |
| CoNi <sub>2</sub> S <sub>4</sub> @CoS <sub>2</sub> /NF | 259                                                | 45                                     | J Colloid Interface Sci,<br>556 (2019) 401-410.               |
| Ni <sub>3</sub> S <sub>2</sub> /MIL-53(Fe)             | 214                                                | 33.8                                   | Journal of Materials<br>Chemistry A, 8 (2020)<br>14574-14582. |
| MIL@TA-Ni                                              | 282                                                | 44.3                                   | Applied Surface<br>Science, 608 (2023).                       |
| Ni-S/MIL-53(Fe)                                        | 256                                                | 39                                     | Nanoscale, 11 (2019)<br>14785-14792.                          |
| MIL-53(Fe-Ni)/NF-2200Gs                                | 174                                                | 58                                     | RSC Adv, 13 (2023)<br>4249-4254.                              |
| h-FeOOH@Ni(OH) <sub>2</sub>                            | 310                                                | 70                                     | Electrochimica Acta,<br>301 (2019) 258-266.                   |
